# Supplementary material
Source: PubMed Central journal article supplement (PMC2573908)

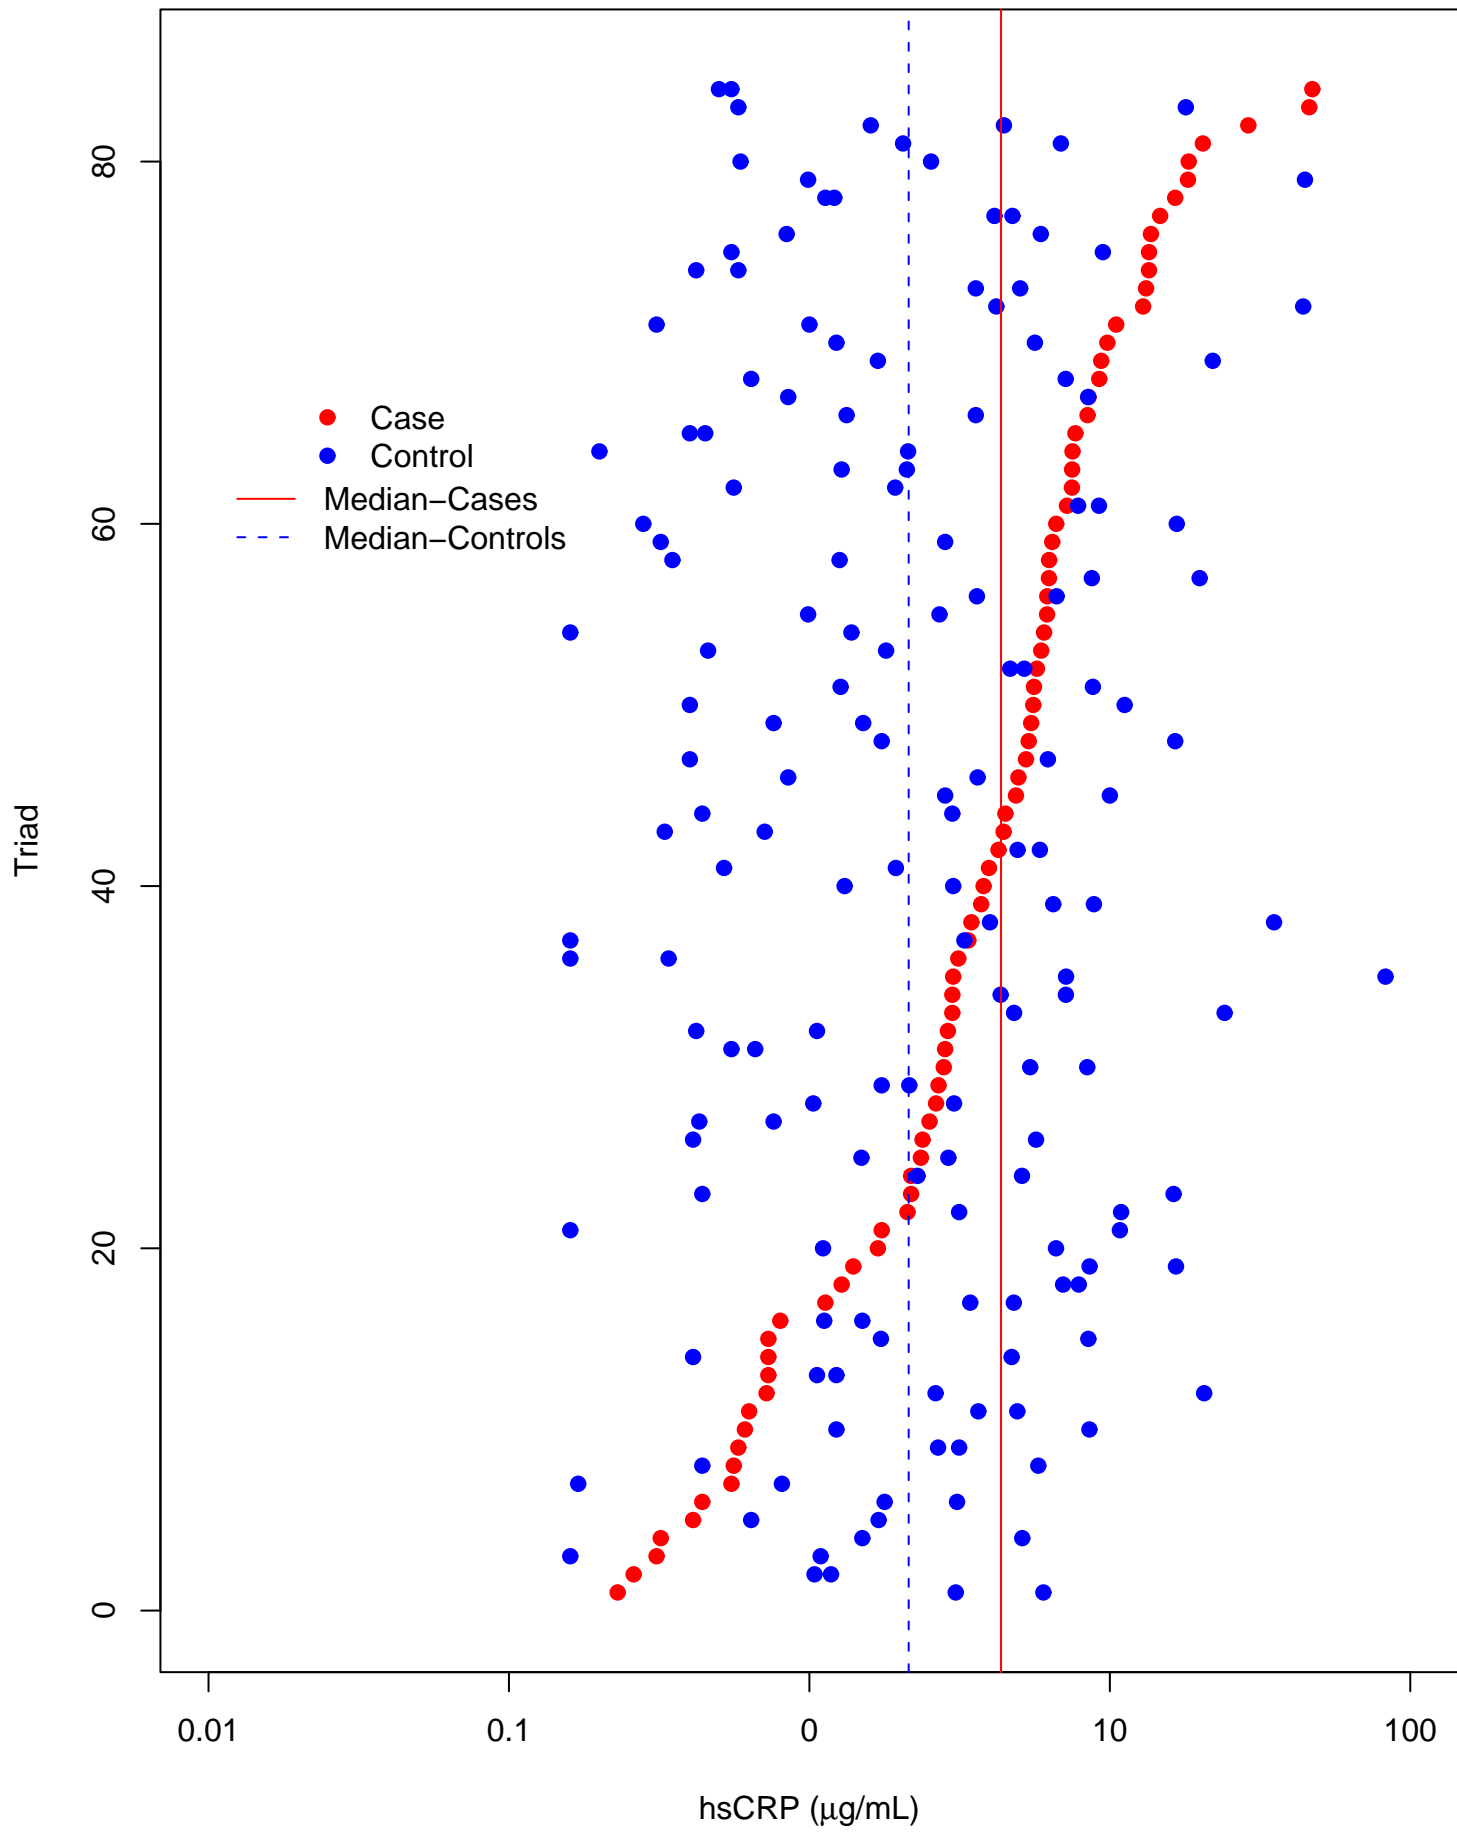

Supplement: pmed.0050203.sg002.pdf [file pmed.0050203.sg002.pdf]

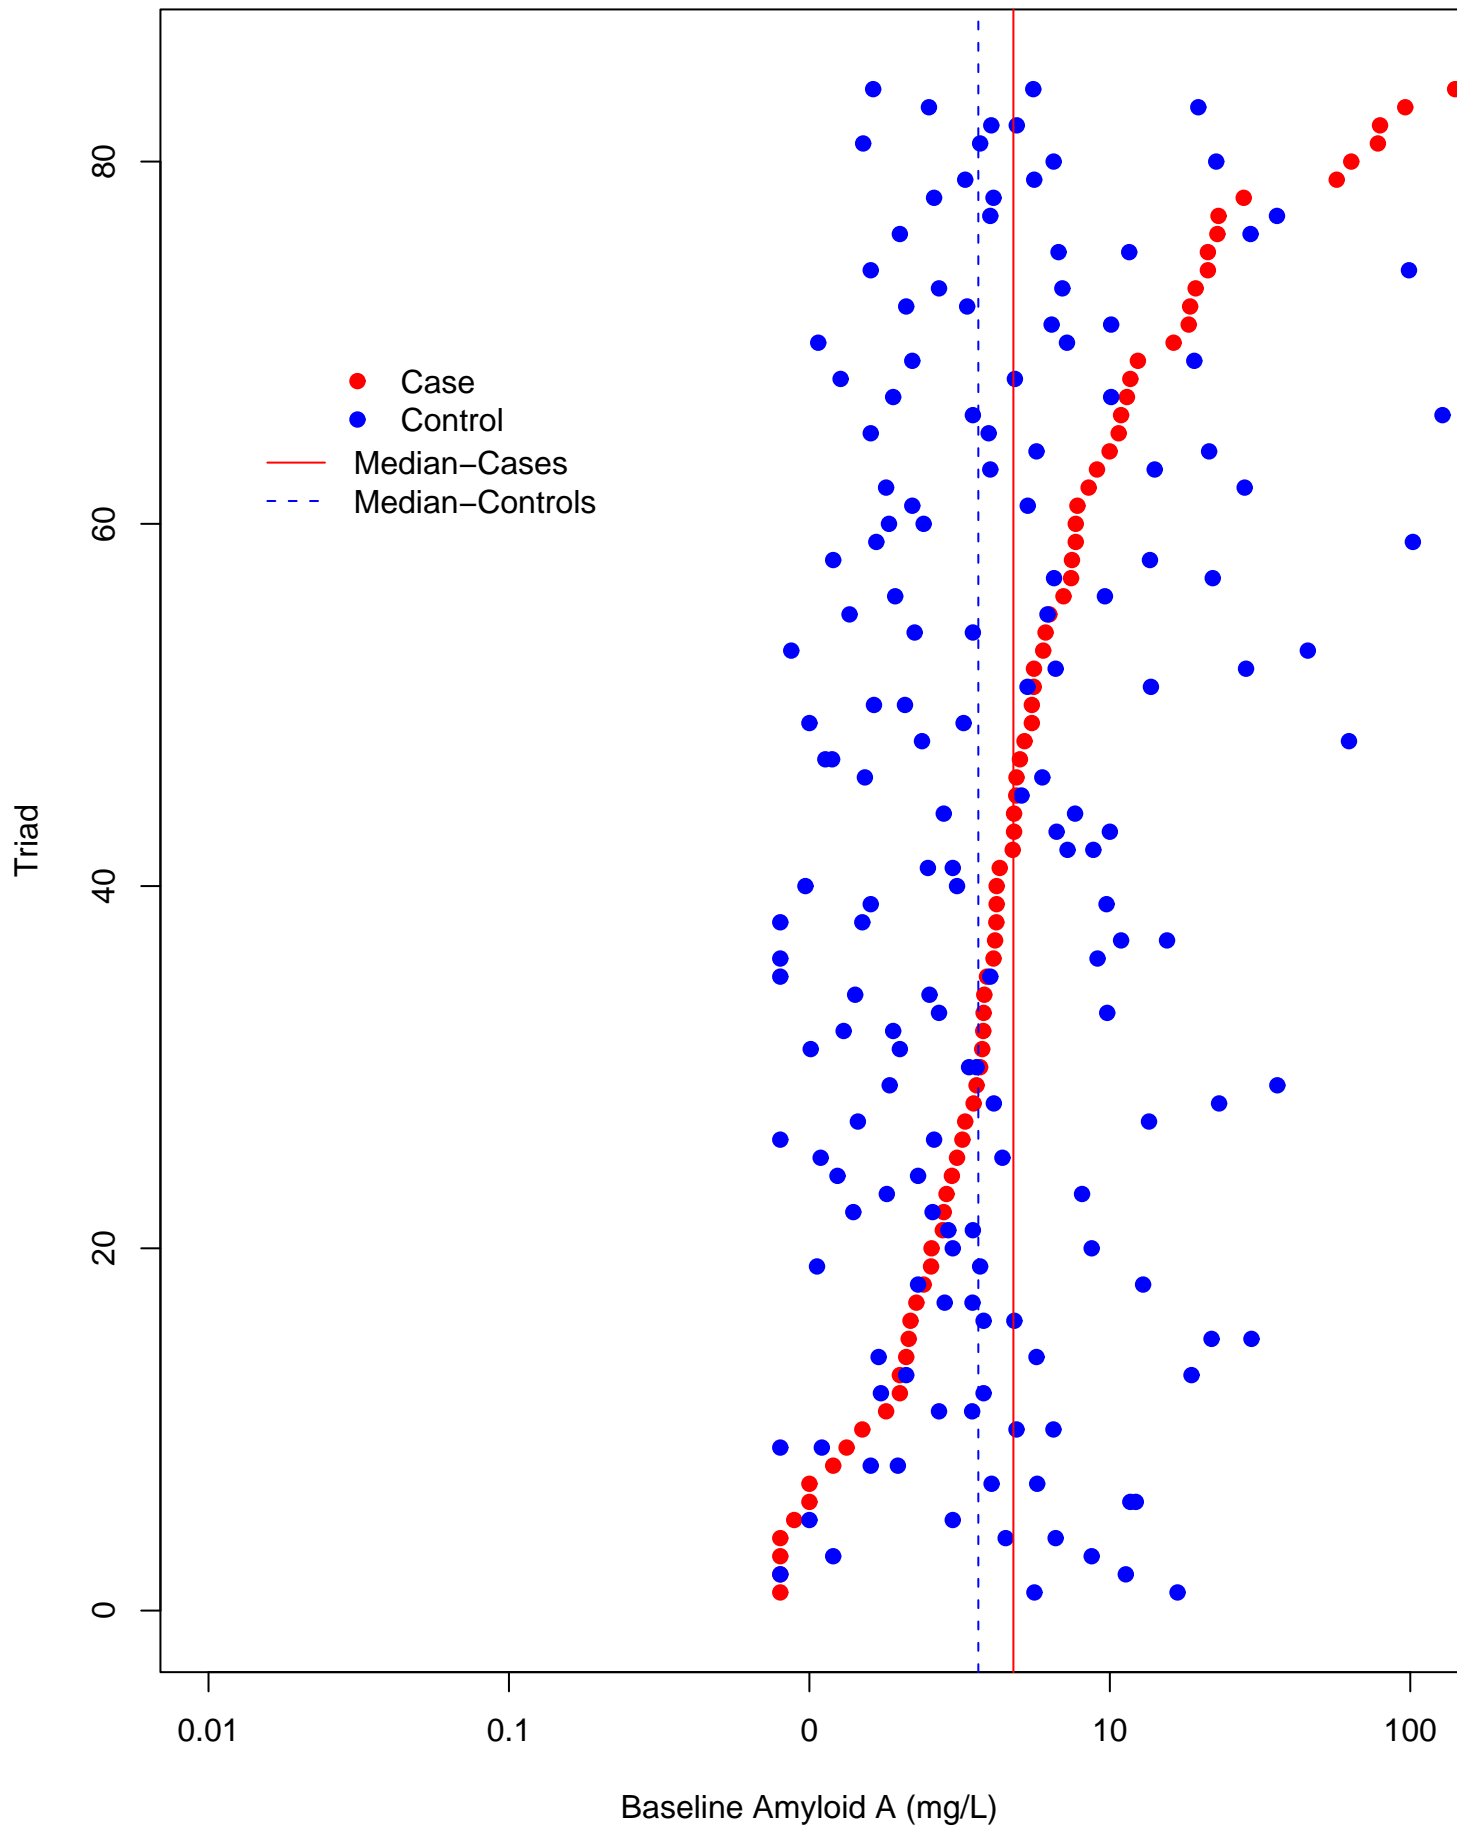

Supplement: pmed.0050203.sg003.pdf [file pmed.0050203.sg003.pdf]

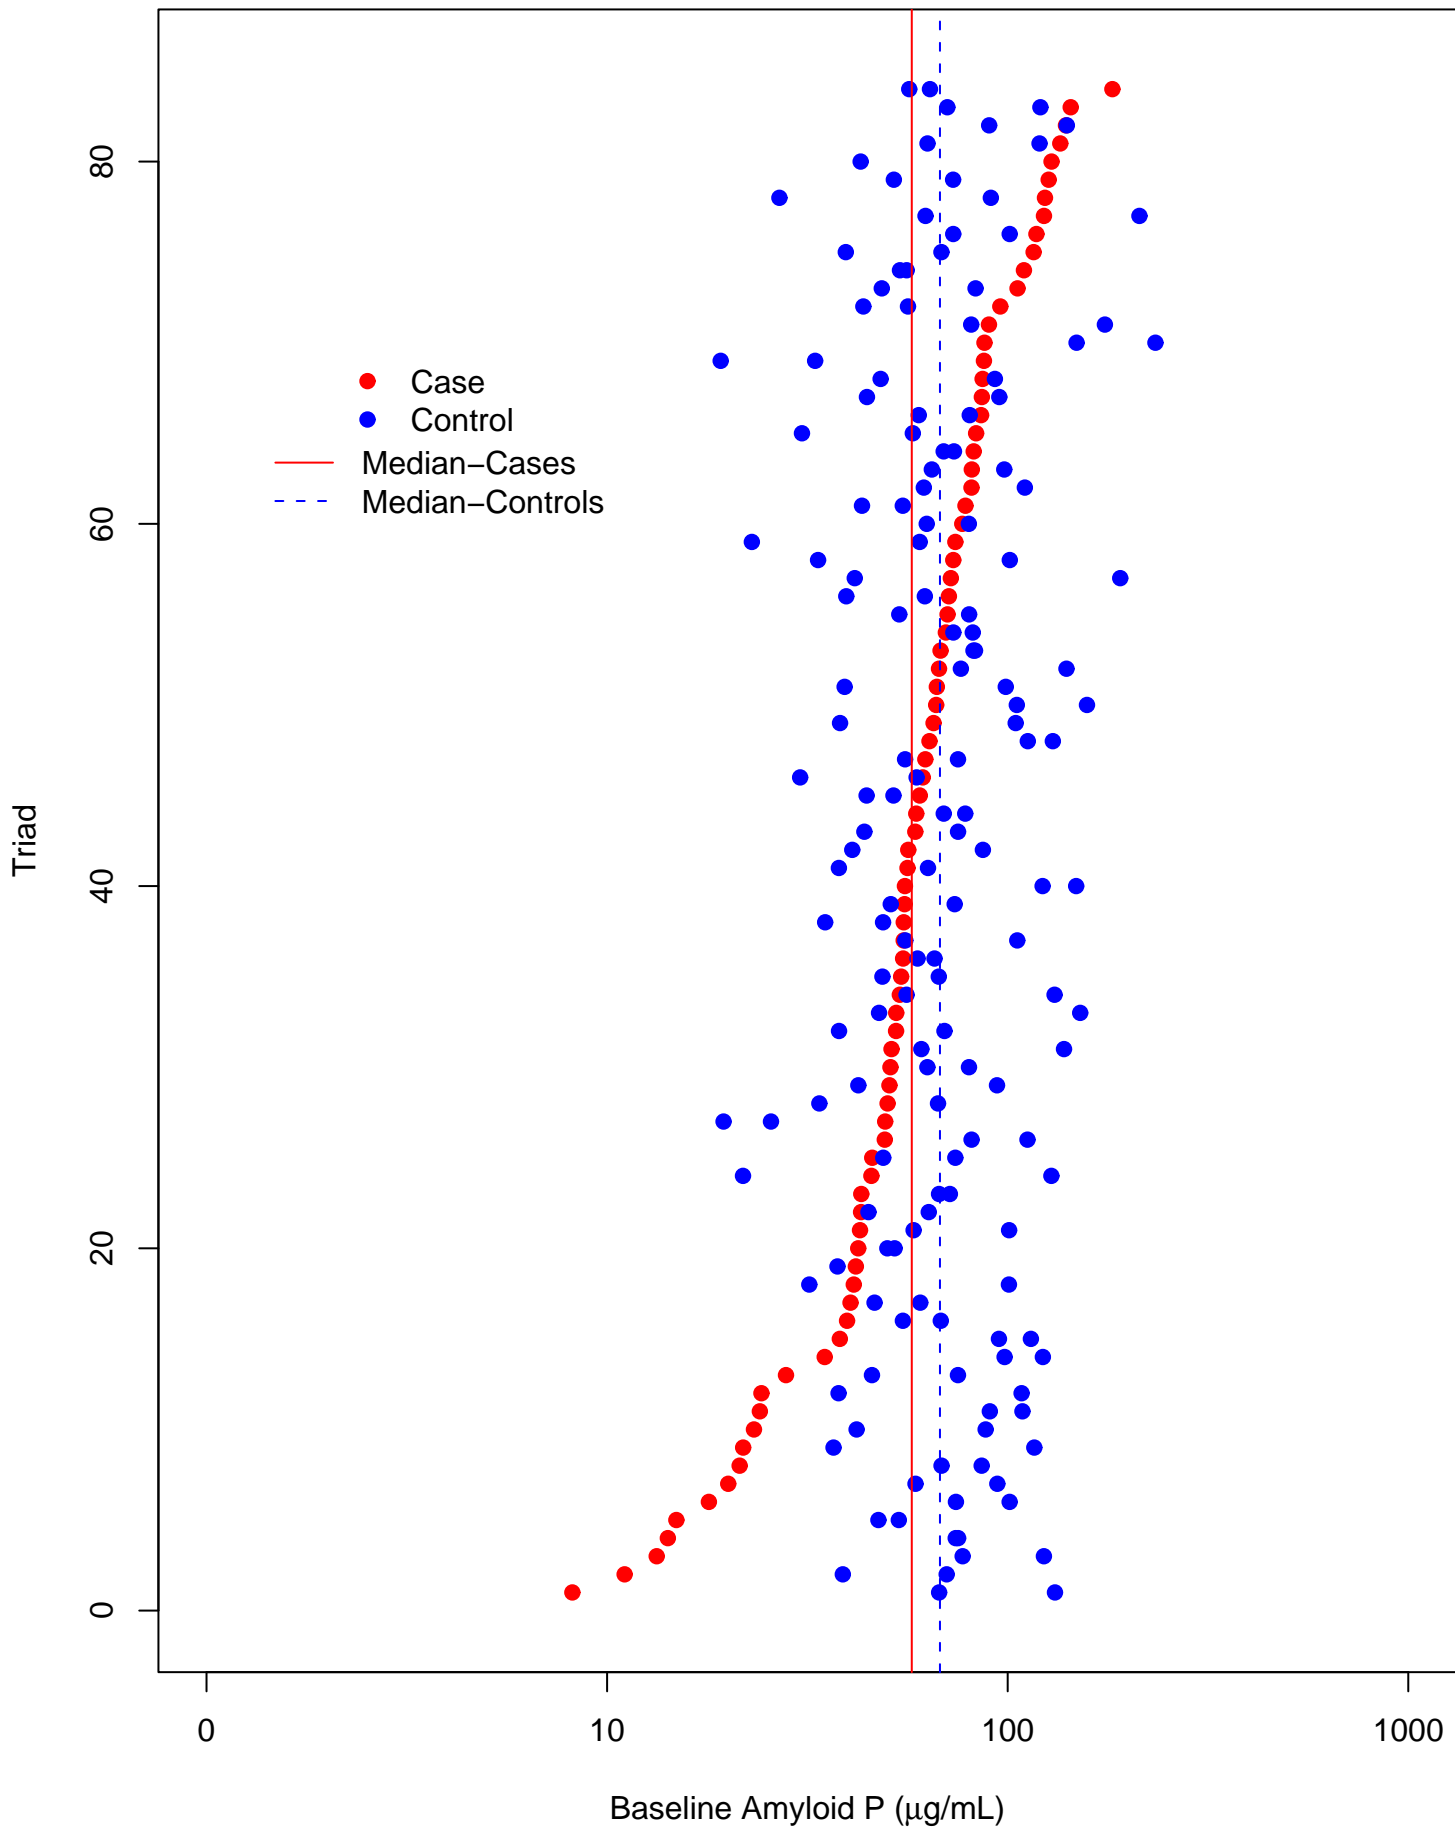

Supplement: pmed.0050203.sg004.pdf [file pmed.0050203.sg004.pdf]

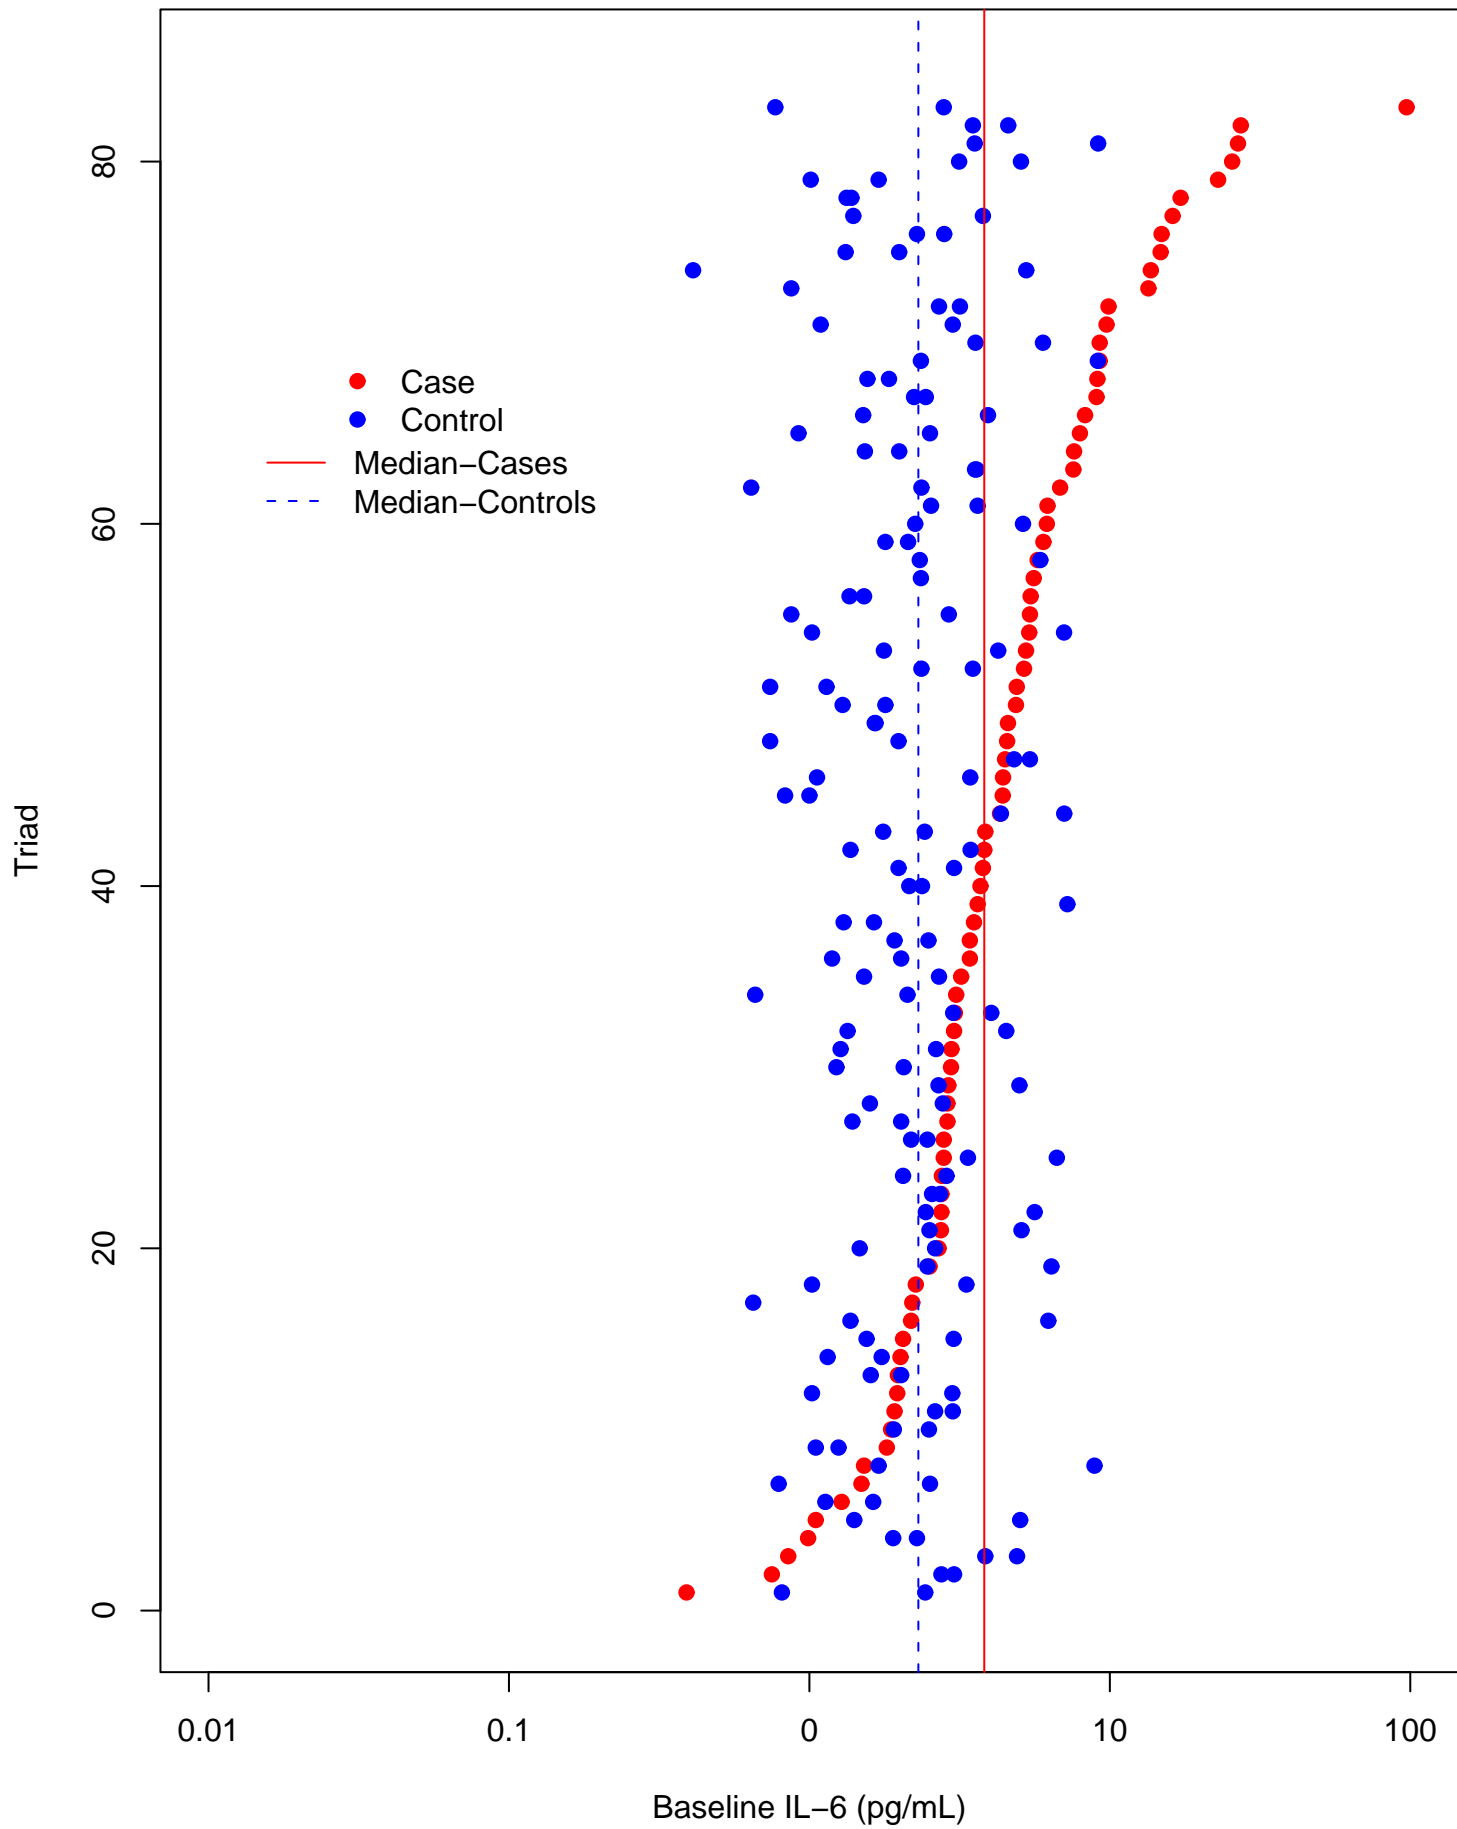

Supplement: pmed.0050203.sg005.pdf [file pmed.0050203.sg005.pdf]

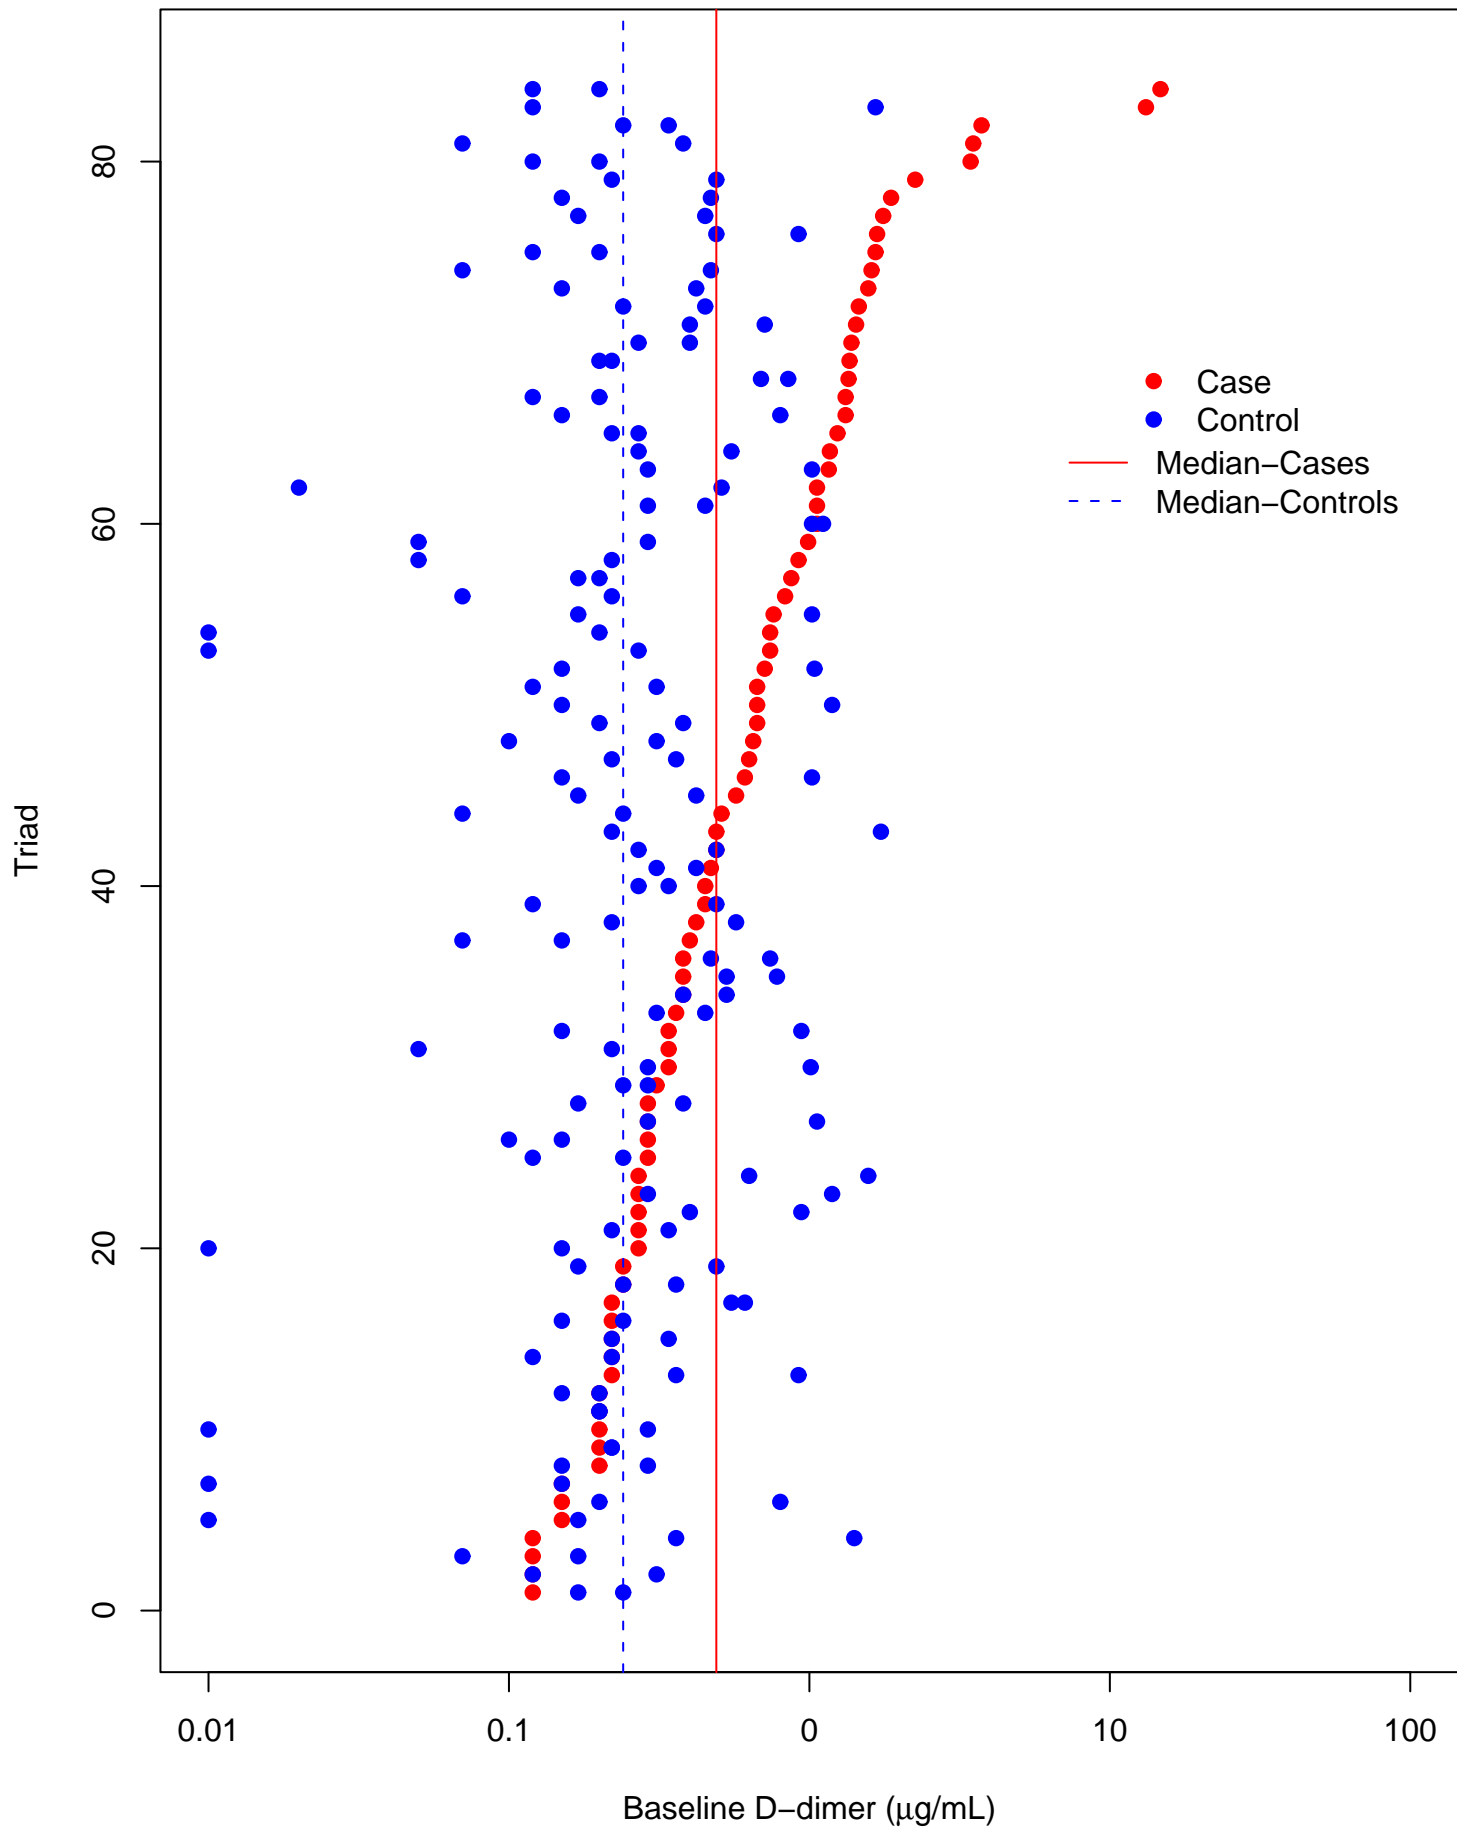

Supplement: pmed.0050203.sg006.pdf [file pmed.0050203.sg006.pdf]

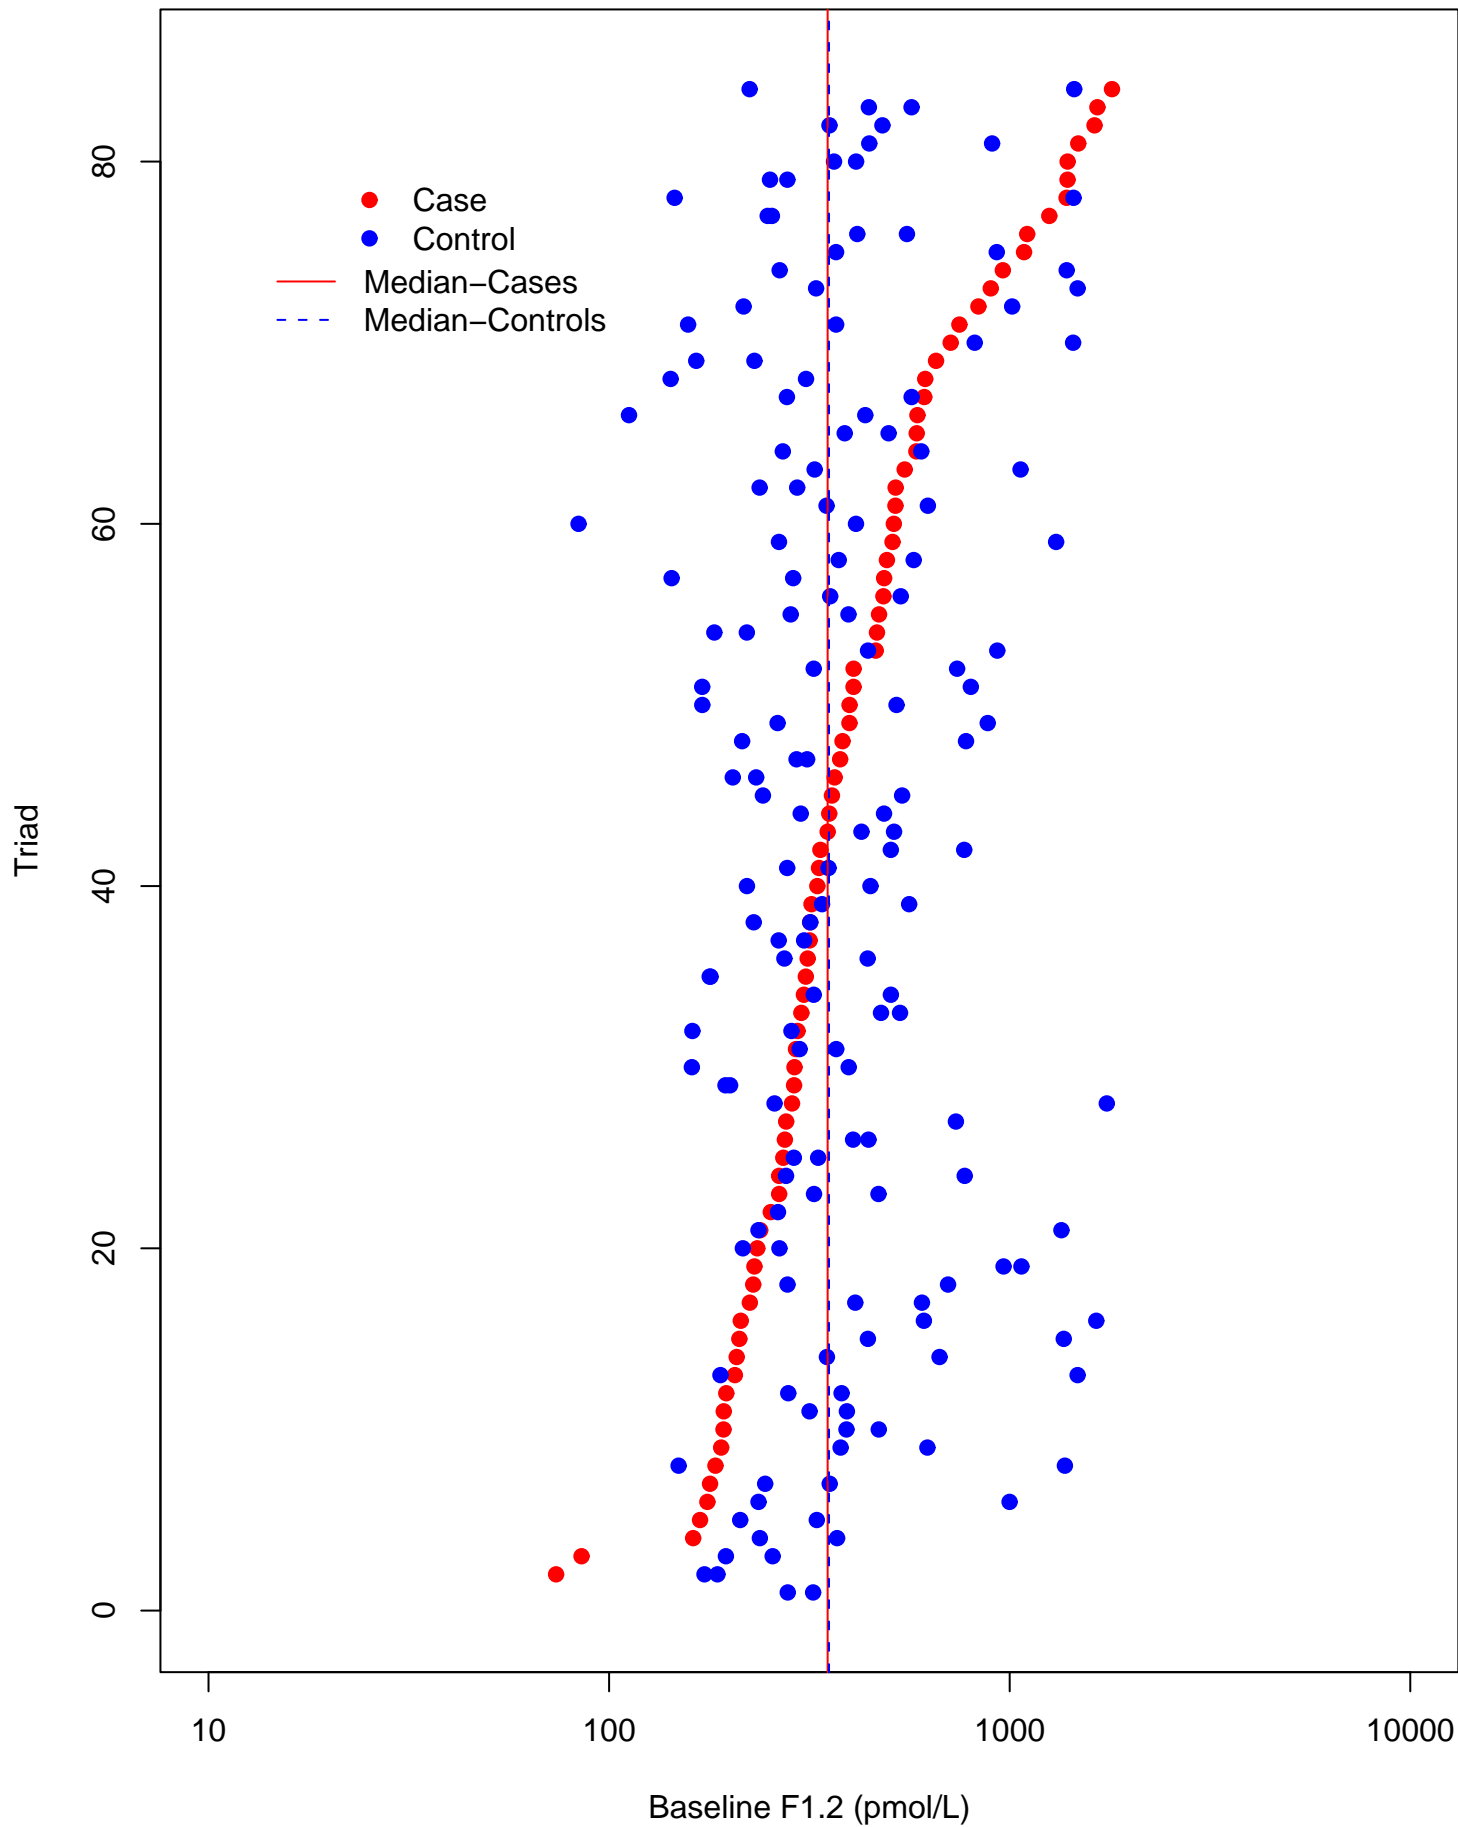

Supplement: pmed.0050203.sg007.pdf [file pmed.0050203.sg007.pdf]
